# Supplementary material for: Methane conversion on cobalt-added liquid-metal indium catalysts
Source: Royal Society of Chemistry journal article supplement (doi:10.1039/d0nj03808c), 2020-01-01
Supplement: d0nj03808c1.pdf [file d0nj03808c1.pdf]

## Supplementary Information

### Methane Conversion on Cobalt-Added Liquid-Metal Indium Catalysts

*Hiroki Tajima, Hitoshi Ogihara,\* Miru Yoshida-Hirahara, Hideki Kurokawa*

Graduate School of Science and Engineering, Saitama University, 255 Shimo-Okubo, Sakura-ku, Saitama  
338-8570, Japan

E-mail: [ogihara@mail.saitama-u.ac.jp](mailto:ogihara@mail.saitama-u.ac.jp)

## Experimental

### Preparation of catalysts

All catalysts were prepared by a typical impregnation method.  $\text{In}(\text{NO}_3)_3 \cdot n\text{H}_2\text{O}$  (Sigma-Aldrich),  $\text{Co}(\text{NO}_3)_2 \cdot 6\text{H}_2\text{O}$  (Kanto Chemical Co., Inc.), and  $\text{SiO}_2$  (CABOT; CAB-O-SIL M-5 Fumed Silica) were added to deionized water (50 mL), and heated on a hot plate under stirring. The obtained powder was calcined at 1073 K in air. Loading of In was 5 wt% in all catalysts. The loading of Co in Co/SiO<sub>2</sub> was 0.5 wt%. In-Co/SiO<sub>2</sub> catalysts with 1, 2, 9, 17, 50 atomic% of Co were prepared, and denoted as In-Co(1), In-Co(2), In-Co(9), In-Co(17), and In-Co(50)/SiO<sub>2</sub>, respectively. The Co loadings for In-Co(1), In-Co(2), In-Co(9), In-Co(17), and In-Co(50)/SiO<sub>2</sub> were 0.026, 0.051, 0.26, 0.51, and 2.6 wt%, respectively.

### CH<sub>4</sub> conversion reaction

CH<sub>4</sub> conversion reactions were performed in a fixed-bed reactor. A schematic of the reaction system is shown in Fig. S1. Catalyst (0.20 g) and quartz wool (50 mg) were placed in a quartz reactor. The reactor was purged with Ar flow, and then the catalyst bed was heated to 1073 K. After reducing the catalysts with H<sub>2</sub> at 1073 K, and purging the reactor with Ar, CH<sub>4</sub> (10 mL min<sup>-1</sup>) was introduced. The CH<sub>4</sub> conversion reaction was carried out for 2 h. In this study, some reactions were carried out repeatedly, and the reproducibility of reaction results was confirmed.

During the reaction, outlet gas of 0.5 mL was injected into gas chromatographs every 15 min. For H<sub>2</sub> and CH<sub>4</sub>, a gas chromatograph (Shimadzu GC-8A, TCD) equipped with a packed column (Active carbon) was used at 473 K (injection/detector) and 443 K (column) under flowing Ar as a carrier gas. For C<sub>2</sub> and C<sub>3</sub> hydrocarbons, a gas chromatograph (Shimadzu GC-8A, FID) equipped with a packed column (Unibeads 1S) was used at 453 K (injection/detector) and 383 K (column) under flowing N<sub>2</sub> as a carrier gas. To quantify gaseous products, calibration curves for all products were prepared by injecting different volume of the gases.

Formed aromatics (benzene, toluene, and naphthalene) were collected in a glass trap cooled with a dry ice/ethanol bath. After the reaction, the trapped aromatics were dissolved in acetonitrile and then 30 mM butyl acetate in acetonitrile was added as an internal standard. The obtained solution was injected into a gas chromatograph (Shimadzu, GC-18A) equipped with a capillary column (Shinwa chemical industries Ltd., ULBON HR-1, 0.25 mm i.d., 30 m) under flowing N<sub>2</sub> as a carrier gas. Temperature for injection/detector was settled at 523 K and temperature for column was raised from 313 K to 473 K at 10 K min<sup>-1</sup>. To quantify the aromatics, solutions containing different concentration of benzene, toluene, naphthalene, and butyl acetate in acetonitrile were prepared and calibration curves were prepared by injecting the solutions into

the GC.

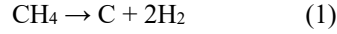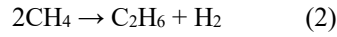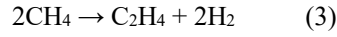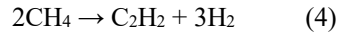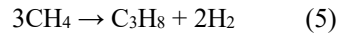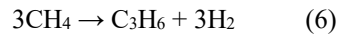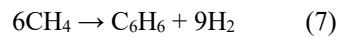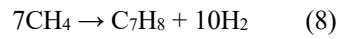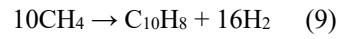

In this study, the reaction eqs. 1~9 can take place. Formation rates for gaseous products were estimated using both the GC analysis and flow rates measured with a soap film meter. Total amounts of gaseous products were calculated by integrating formation rates every 15 min. Yields of gaseous products and aromatics were calculated by dividing total amount of products by reaction time. Yield for coke was evaluated from the yields of all products for 2 h using eq. 10.

$$\begin{aligned} Y_{\text{coke}} &= 1/2 (Y_{\text{H}_2 \text{ detected}} - Y_{\text{H}_2 \text{ (formed by hydrocarbon formation)}}) \\ &= 1/2(Y_{\text{H}_2} - Y_{\text{C}_2\text{H}_6} - 2Y_{\text{C}_2\text{H}_4} - 3Y_{\text{C}_2\text{H}_2} - 2Y_{\text{C}_3\text{H}_8} - 3Y_{\text{C}_3\text{H}_6} - 9Y_{\text{C}_6\text{H}_6} - 10Y_{\text{C}_7\text{H}_8} - 16Y_{\text{C}_{10}\text{H}_8}) \end{aligned} \quad (10)$$

#### Ethylene conversion reaction

The catalyst (0.50 g) and quartz wool (15 mg) were placed in a quartz reactor. The reactor was purged with Ar flow, and then the catalyst bed was heated to 1023 K. After reducing the catalysts with H<sub>2</sub> at 1023 K, a mixture of Ar/H<sub>2</sub>/ethylene (C<sub>2</sub>H<sub>4</sub>) (47/3/3 mL min<sup>-1</sup>) was introduced. The reaction was carried out for 2 h. Analysis procedures for products were the same as in the CH<sub>4</sub> conversion reactions.

Yield for coke was evaluated from the yields of all products using eq. 11.

$$Y_{\text{coke}} = Y_{\text{H}_2} + Y_{\text{CH}_4} + Y_{\text{C}_2\text{H}_6} - 2Y_{\text{C}_2\text{H}_2} - 3Y_{\text{C}_6\text{H}_6} - 4Y_{\text{C}_7\text{H}_8} - 6Y_{\text{C}_{10}\text{H}_8} \quad (11)$$

#### CH<sub>4</sub> and C<sub>2</sub>H<sub>4</sub> conversion

CH<sub>4</sub> conversion and C<sub>2</sub>H<sub>4</sub> conversion were calculated as follows:

$$\text{CH}_4 \text{ conv.} = (\text{r}_{\text{coke}} + 2\text{r}_{\text{C}_2\text{H}_6} + 2\text{r}_{\text{C}_2\text{H}_4} + 2\text{r}_{\text{C}_2\text{H}_2} + 3\text{r}_{\text{C}_3\text{H}_8} + 3\text{r}_{\text{C}_3\text{H}_6} + 6\text{r}_{\text{C}_6\text{H}_6} + 7\text{r}_{\text{C}_7\text{H}_8} + 10\text{r}_{\text{C}_{10}\text{H}_8}) / \text{r}_{\text{CH}_4, \text{inlet}} \times 100 \quad (12)$$

$$\text{C}_2\text{H}_4 \text{ conv.} = (\text{r}_{\text{coke}} + \text{r}_{\text{CH}_4} + 2\text{r}_{\text{C}_2\text{H}_6} + 2\text{r}_{\text{C}_2\text{H}_2} + 3\text{r}_{\text{C}_3\text{H}_6} + 6\text{r}_{\text{C}_6\text{H}_6} + 8\text{r}_{\text{C}_8\text{H}_8} + 10\text{r}_{\text{C}_{10}\text{H}_8}) / (2\text{r}_{\text{C}_2\text{H}_4, \text{inlet}}) \times 100 \quad (13)$$

The conversions shown in Tables 1 and 2 are average values during the reaction.

As described above, we collected formed aromatics in a glass trap cooled with a dry ice/ethanol bath and analyzed them after the reaction. Therefore, when we evaluated time course of conversions (Figs. S2 and S4), we calculated the formation rates of aromatic based on the total amount of them, assuming that formation rates of aromatics were the same during the reaction. The rates for C<sub>2</sub> and C<sub>3</sub> formation were calculated from GC analysis and flow rate measurement every 15 min. The rate of coke formation was calculated using eq. 1, assuming that formation rates of aromatics were the same during the reaction. The rate for CH<sub>4</sub> (inlet) was measured by using a soap film meter prior to the reaction.

### Characterization

Powder X-ray diffraction (XRD) patterns were recorded with a D2 phaser (Bruker), using Cu K $\alpha$  radiation. Field emission scanning electron microscopy (FE-SEM) images were obtained with S-4800 (Hitachi High-Technologies) at 15 kV of accelerating voltage. EDX analysis was carried out using Quantax 400 with XFlash 4010 (Bruker) equipped with the S-4800. Nitrogen adsorption-desorption measurements at 77 K were performed on a Belsorp II (MicrotracBEL) sorption analyzer. Prior to the sorption measurements, the samples were degassed under vacuum at 403 K. Specific surface area was calculated by Brunauer-Emmett-Teller method. Transmission electron microscopy (TEM) and scanning transmission electron microscopy (STEM) observation of the catalyst was performed on a JEM-ARM200F-B (JEOL Ltd., Japan) instrument operated at the acceleration voltage of 200 kV.

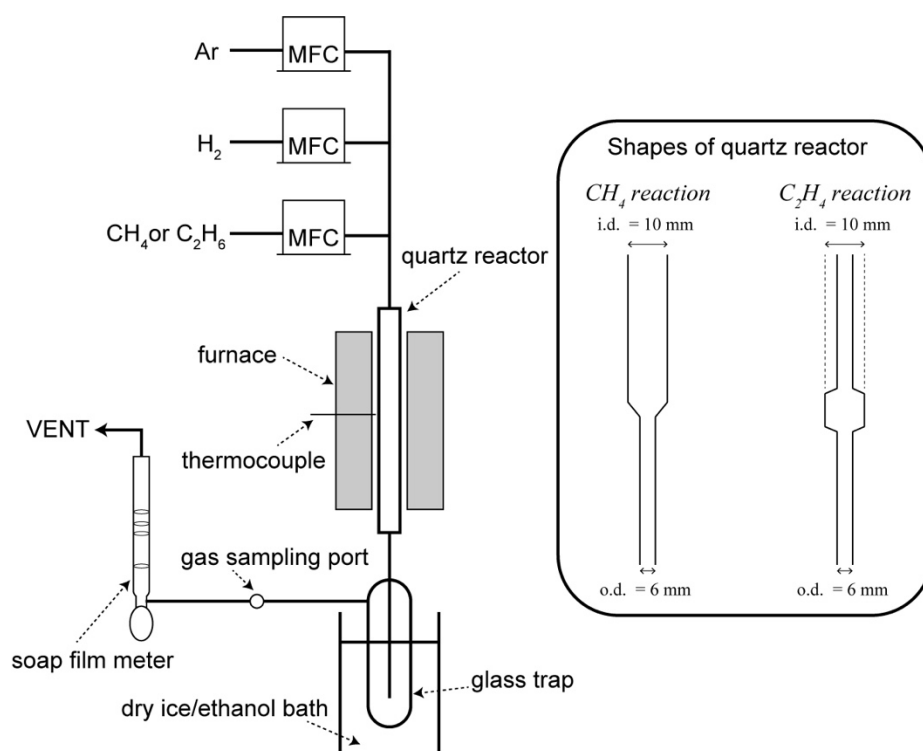

**Fig. S1.** The schematic diagram of the reaction system in this study.

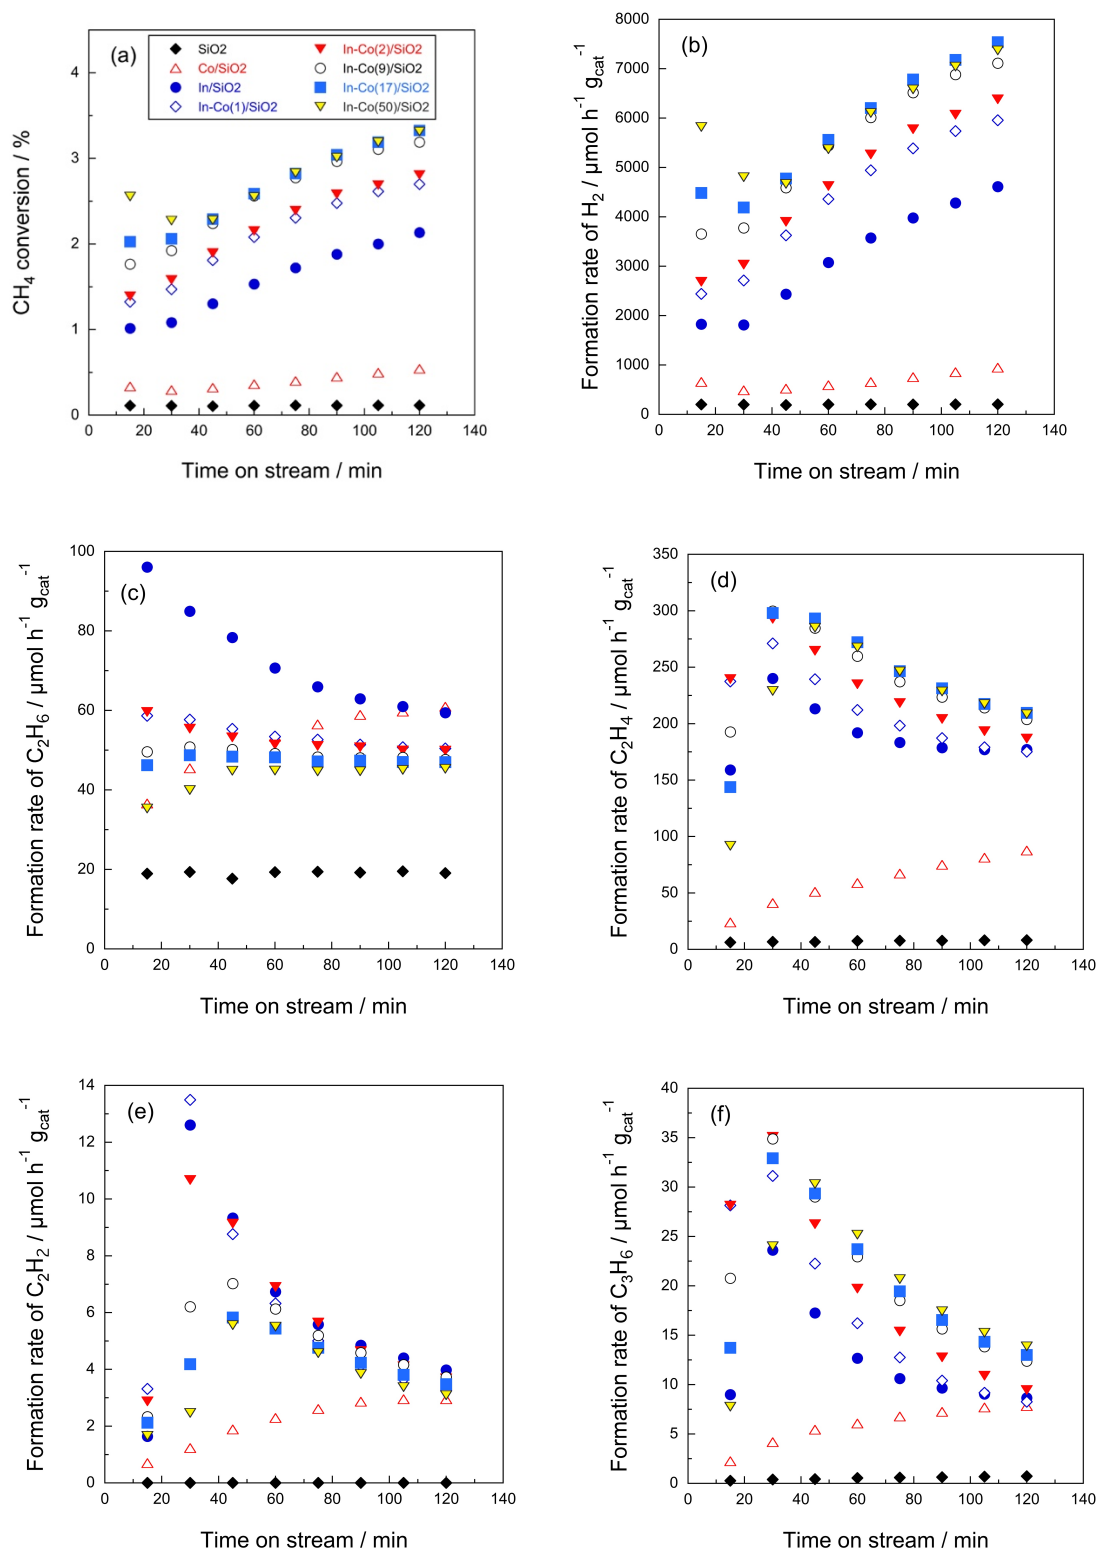

**Fig. S2.** Time course of dehydrogenative conversion of CH<sub>4</sub> at 1073 K; (a) CH<sub>4</sub> conversion and formation rate of (b) H<sub>2</sub>, (c) C<sub>2</sub>H<sub>6</sub>, (d) C<sub>2</sub>H<sub>4</sub>, (e) C<sub>2</sub>H<sub>2</sub>, and (f) C<sub>3</sub>H<sub>6</sub>.

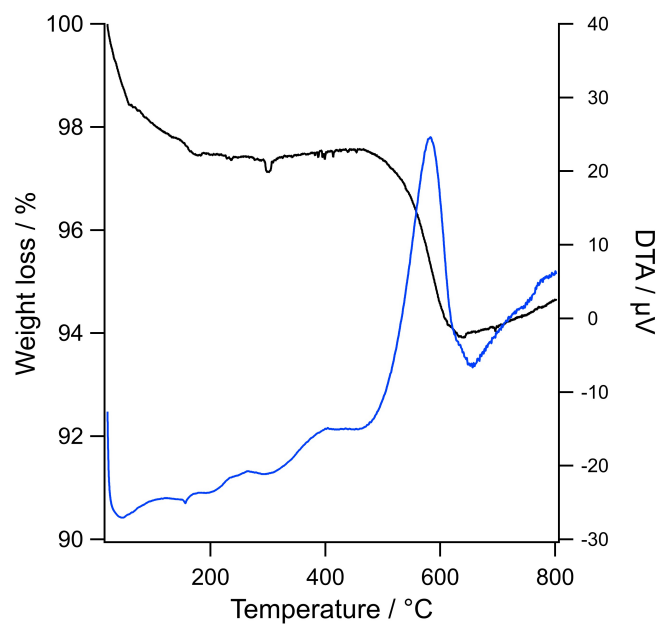

**Fig. S3.** TG/DTA curves of In-Co(17)/SiO<sub>2</sub> after CH<sub>4</sub> conversion at 1073 K.

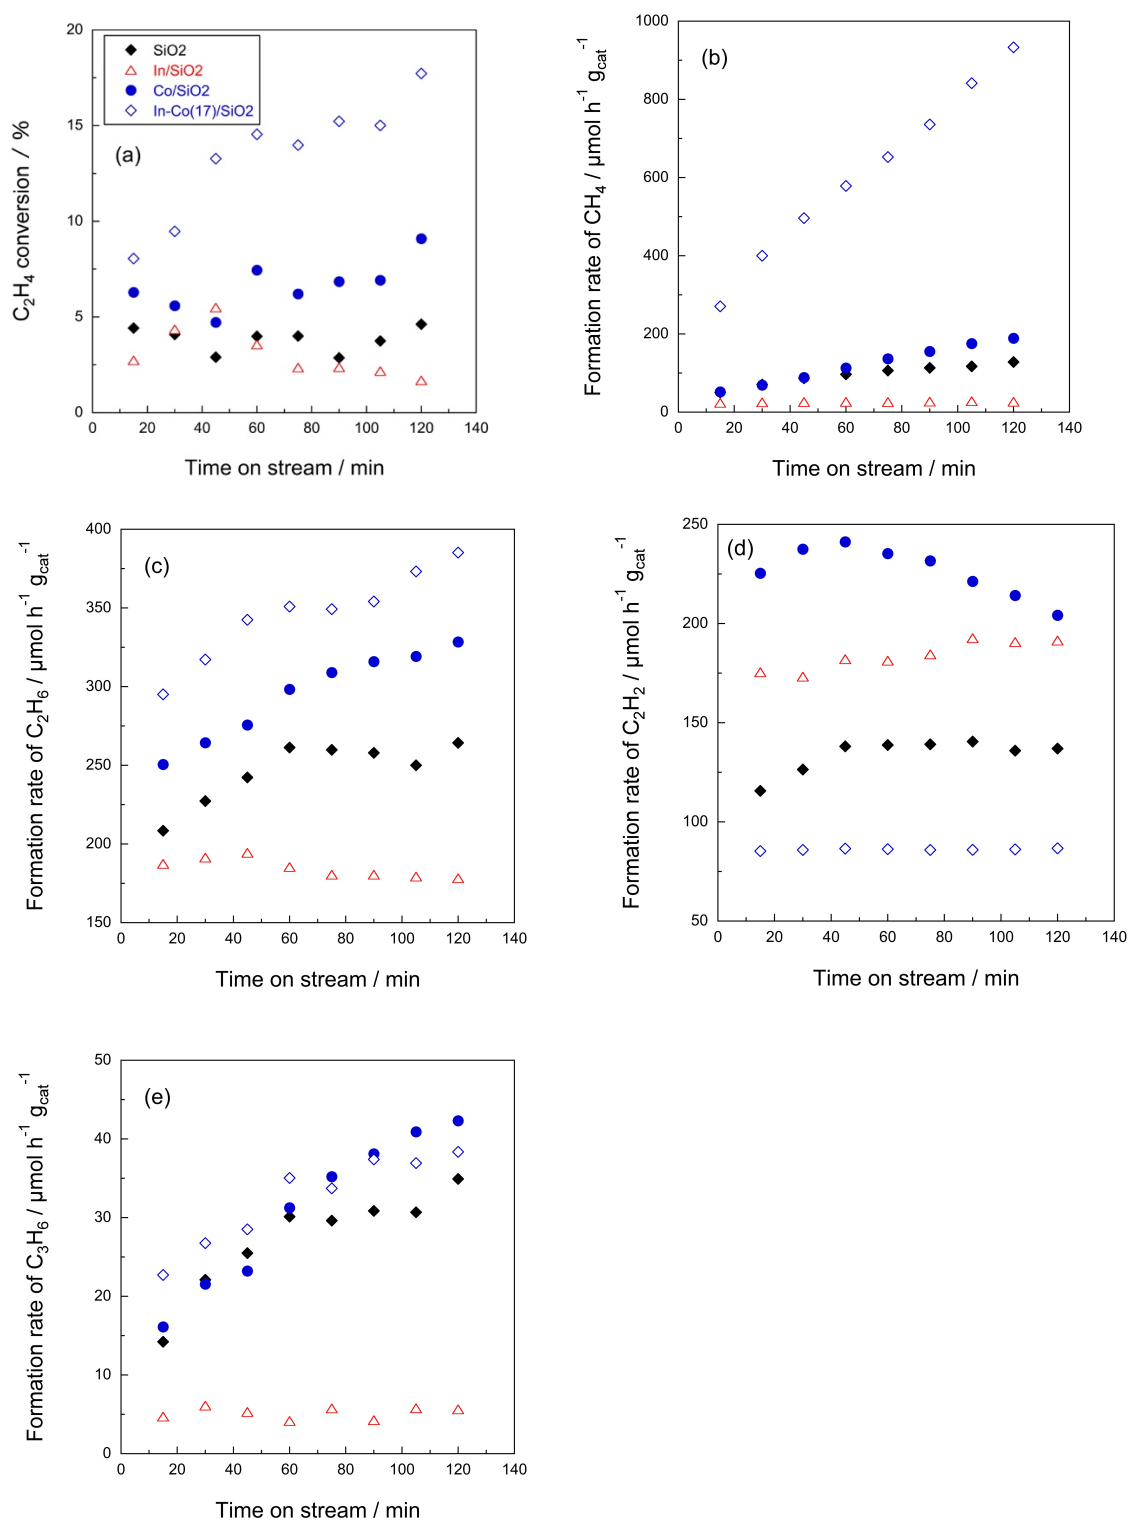

**Fig. S4.** Time course of conversion of C<sub>2</sub>H<sub>4</sub> at 1023 K; (a) C<sub>2</sub>H<sub>4</sub> conversion and formation rate of (b) CH<sub>4</sub>, (c) C<sub>2</sub>H<sub>6</sub>, (d) C<sub>2</sub>H<sub>2</sub>, and (e) C<sub>3</sub>H<sub>6</sub>.



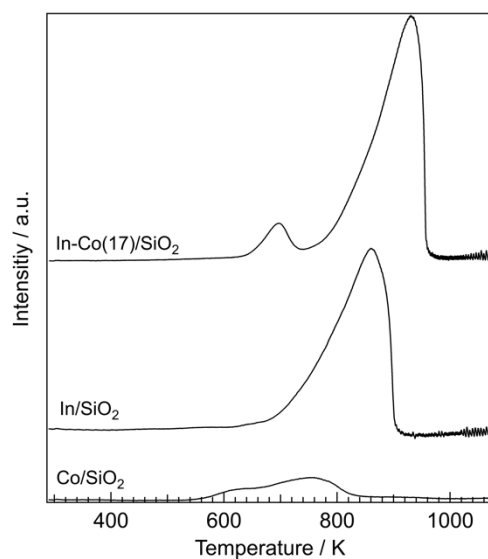

**Fig. S5.** Temperature programmed reduction (TPR) profiles for In/SiO<sub>2</sub>, In-Co(17)/SiO<sub>2</sub>, and Co/SiO<sub>2</sub>.

For the TPR analysis, catalysts after calcination at 1073 K were used. Prior to TPR, the catalysts were pre-treated under flowing He and elevating temperature to 1073 K at 10 K/min. TPR was carried out under flowing 5% H<sub>2</sub> in Ar and elevating temperature from room temperature to 1073 K at 5 K/min.
